# Supplementary material
Source: PubMed Central journal article supplement (PMC10243575)
Supplement: sj-pdf-2-ctc-10.1177_25152564221136388.pdf [file sj-pdf-2-ctc-10.1177_25152564221136388.pdf]

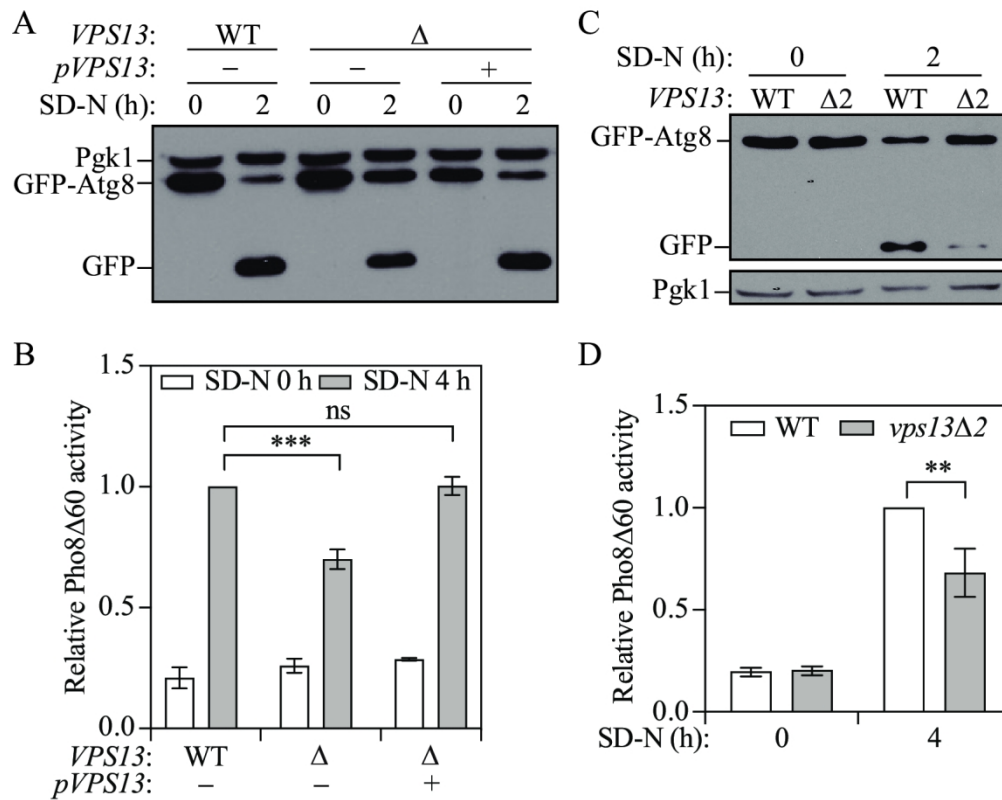

**Figure S1.** *Vps13* is important for efficient autophagy. Protein samples were collected from (**A and B**) wild-type ([YLY085](#)) and *vps13Δ* cells ([YLY086](#)) with the indicated [pRS313](#) plasmids or (**C and D**) from wild-type cells ([YLY085](#)) and cells with most of *VPS13* deleted ([WXY222](#)) after growth in [YPD](#) to mid-log phase (SD-N 0 h) and (**A and C**) 2 h or (**B and D**) 4 h after nitrogen starvation. Western blots were probed and [Pho8Δ60](#) was quantified as indicated in Figure 1. \*\* $p < 0.01$ , \*\*\* $p < 0.001$ , ns, not significant. Related to Fig. 1.

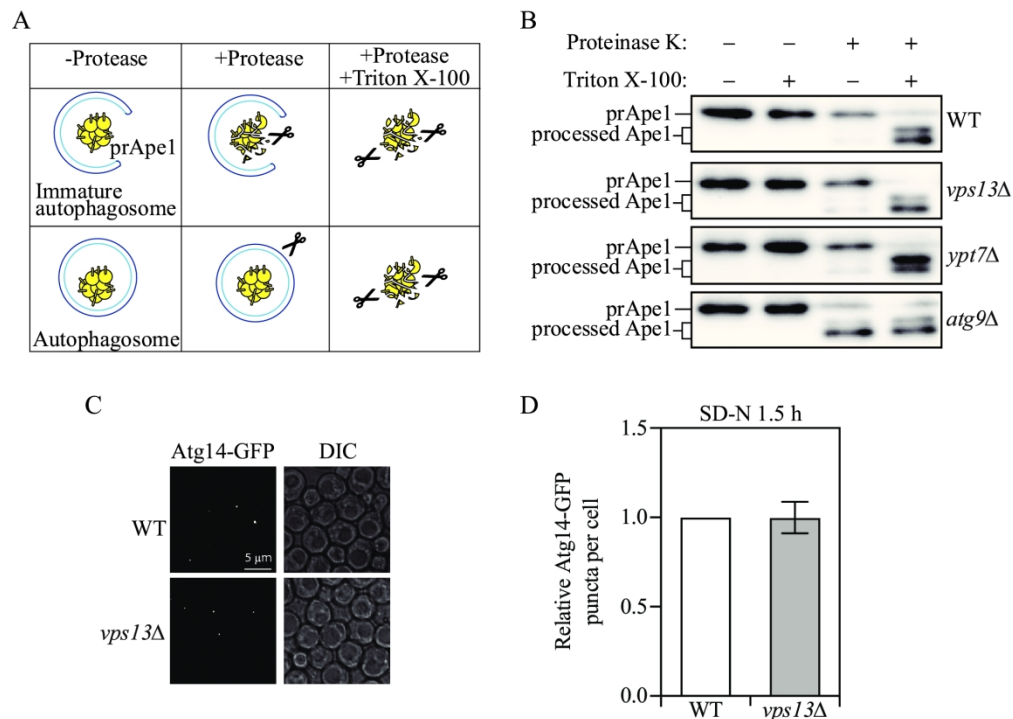

**Figure S2. Autophagosome completion is not affected by *VPS13* deletion.** (A) Schematic representation of the protease-protection assay. (B) Wild-type (*YLY085*), *vps13Δ* (*YLY086*), *ypt7Δ* (*YLY162*) and *atg9Δ* (*YLY164*) cells were cultured in YPD to mid-log phase and then transferred to nitrogen starvation medium (SD-N) for 3 h. A protease-protein assay was conducted as described in the Materials and Methods. (C and D) Wild-type (*UNY176*, *Atg14-GFP*) and *vps13Δ* (*YLY145*, *Atg14-GFP*) cell samples were collected 1.5 h after nitrogen starvation (SD-N) and imaged. The total puncta to total cell number ratio was quantified and normalized to wild-type cells. In the quantitative analysis, the error bar represents the SD of three independent experiments. **DIC**: differential interference contrast. Related to Fig. 2.

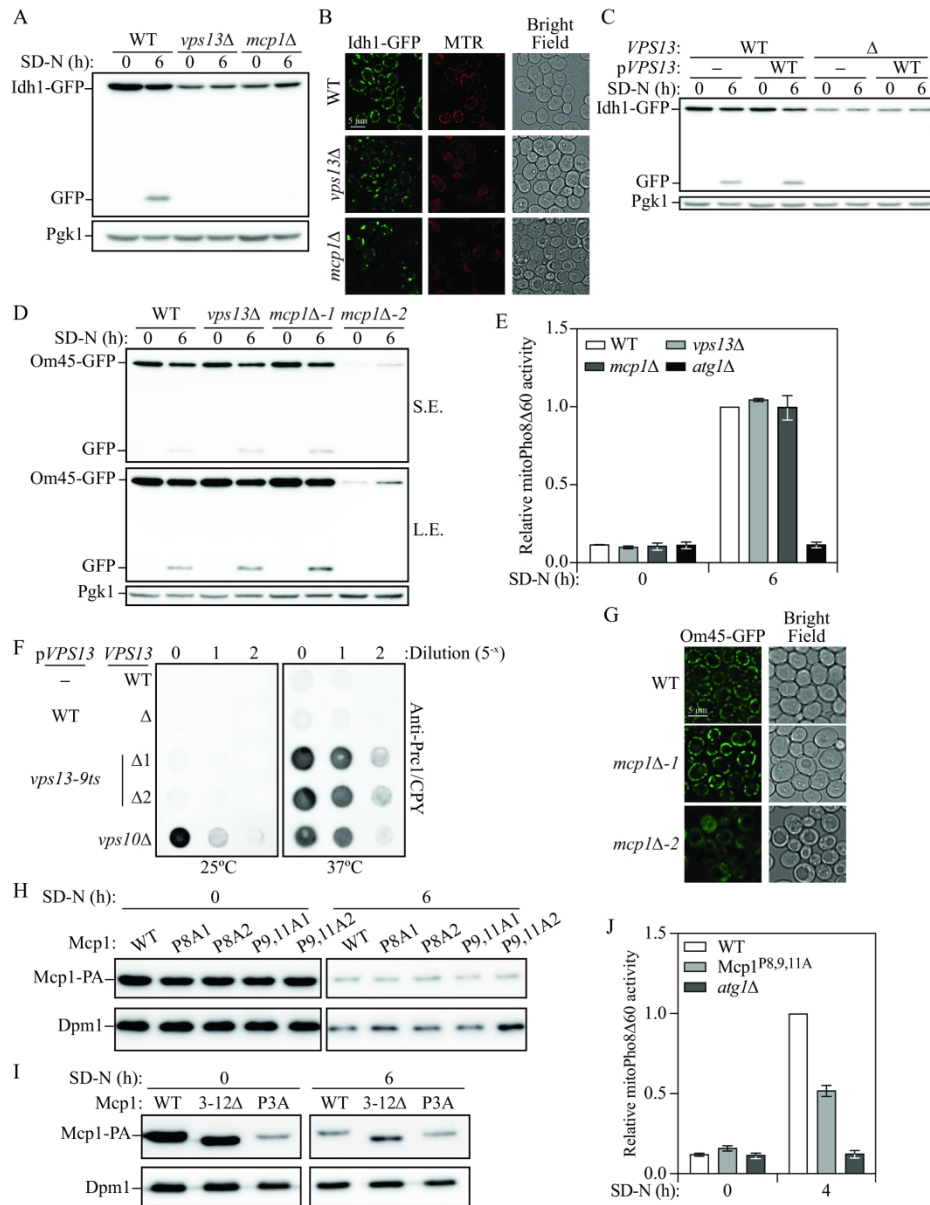

**Figure S3.** Neither Vps13 nor the interaction between Vps13 and Mcp1 is important for mitophagy. (A) Wild-type (YLY068, Idh1-GFP), *vps13Δ* (YLY123, Idh1-GFP) and *mcp1Δ* (YLY124, Idh1-GFP) cells were cultured as indicated in Materials and Methods to induce mitophagy. Protein samples were collected from the culture in YPL (SD-N 0 h) and 6 h after nitrogen starvation. Western blots were probed as indicated in Figure 3C. (B) The same cells as in (A) were cultured in YPD to mid-log phase, shifted to YPL for 18 h and stained with 50 nM MitoTracker Red (MTR) for 30 min before imaging. Single Z-sections of representative images were shown. (C) Wild-type (YLY068) or *vps13Δ* cells (YLY123) with an empty pRS313 vector or pRS313 vector bearing wild-type Vps13 were cultured as indicated in the Materials and Methods to induce mitophagy. Protein samples were collected from the culture in SML-His (SD-N 0 h) and 6 h after nitrogen

starvation (SD-N). Western blots were probed with anti-YFP and anti-Pgk1 antibodies or antisera. **(D)** Wild-type (TKYM23, Om45-GFP), *vps13Δ* (YLY083, Om45-GFP) and *mcp1Δ* (YLY084, Om45-GFP; two different colonies were included) cells were cultured as indicated in Materials and Methods to induce mitophagy. Two *mcp1Δ* colonies have the same apparent genotype, but *mcp1Δ-2* cells grew slower, and the *mcp1Δ-1* cells grew at the normal rate. Protein samples were collected from the culture in YPL (SD-N 0 h) and 6 h after nitrogen starvation. Western blots were probed as indicated in (C). **(E)** Wild-type (KDM1009), *vps13Δ* (YLY087), *mcp1Δ* (YLY088) and *atg1Δ* (KDM1024, as control) strains were cultured as described in Materials and Methods to induce mitophagy. Protein samples were collected from the culture in YPL (SD-N 0 h) and 6 h after nitrogen starvation. mitoPho8Δ60 was used to measure mitophagy activity. mitoPho8Δ60 activity was quantified as indicated in Figure 3. **(F)** The same cells as in Fig. 3D and *vps10Δ* (YLY279, as a control) cells were cultured in SMD-His or YPD at 25°C to mid-log phase and a Prc1/CPY secretion assay was performed as described in Materials and Methods. **(G)** The same cells in (D) were cultured in YPD to mid-log phase and shifted to YPL for 18 h before imaging. Single Z-sections of representative images are shown. **(H)** Wild-type (YLY110 Mcp1-PA), *MCPI* single mutant (YLY115, two colonies were included) and double mutant (YLY116, two colonies were included) cells or **(I)** *MCPI* truncated (YLY111) and triple mutant cells (YLY112; P3A) cells were cultured as indicated in Materials and Methods to induce mitophagy. Protein samples were collected from the culture in YPL (SD-N 0 h) and 6 h after nitrogen starvation. Western blots were probed with anti-PA and anti-Dpm1 antibodies. **(J)** Wild-type (YLY110, Mcp1-PA), *MCPI* triple mutant cells (YLY112) and *atg1Δ* (KDM1024, as control) cells were cultured as described in Materials and Methods to induce mitophagy. Protein samples were collected from the culture in YPL (SD-N 0 h) and 6 h after nitrogen starvation. mitoPho8Δ60 was used to measure mitophagy activity. mitoPho8Δ60 activity was quantified as indicated in Figure 3. Related to Fig. 3.
